# Supplementary material for: faSavageHutterFOAM 1.0: depth-integrated simulation of dense snow avalanches on natural terrain with OpenFOAM
Source: Copernicus journal article supplement (doi:10.5194/gmd-11-2923-2018), 2018-07-23
Supplement: Supplementary file 1 [file gmd-11-2923-2018-supplement.zip]

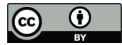

## Supplement of

# faSavageHutterFOAM 1.0: depth-integrated simulation of dense snow avalanches on natural terrain with OpenFOAM

Matthias Rauter et al.

Correspondence to: Matthias Rauter (matthias.rauter@uibk.ac.at)

- gmd-11-2923-2018-supplement-  
title-page.pdf
- faSavageHutterFoam1.0
  - Allclean
  - Allwmake
  - README.md
  - README.pdf
  - entrainmentModels
    - \* Erosionenergy
    - \* Front
    - \* IsslerFC
    - \* Make
    - \* Medina
    - \* Stoppingprofile
    - \* depositionModel
    - \* depositionOff
    - \* entrainmentModel
    - \* entrainmentModels.pro
    - \* entrainmentOff
  - explicitSolver
    - \* Make
    - \* calcBasalstress.H
    - \* calcFluxes.h
    - \* createFaFields.H
    - \* createFvFields.H
    - \* explicitSolver.pro
    - \* faSavageHutterFoamExp.C
    - \* readSolutionControls.H
  - \* readTransportProperties.H
  - \* surfaceCourantNo.H
  - faSavageHutterFoam.pro
  - frictionModels
    - \* DarcyWeisbach
    - \* Make
    - \* ManningStrickler
    - \* PoliquenForterre
    - \* Voellmy
    - \* frictionModel
    - \* frictionModels.pro
    - \* kt
    - \* muI
  - hooks
    - \* Make
    - \* cfdfunction.C
    - \* cfdfunction.H
    - \* dynamicpressure
    - \* hooks.pro
    - \* radar
    - \* slabs
    - \* totalenergy
    - \* totalmomentum
  - implicitSolver
    - \* Make
    - \* calcBasalstress.H
    - \* createFaFields.H
    - \* createFvFields.H
    - \* faSavageHutterFoam.C
  - \* implicitSolver.pro
  - \* readSolutionControls.H
  - \* readTransportProperties.H
  - \* surfaceCourantNo.H
  - postProcessing
    - \* depositAll
    - \* faMeshToAscii
    - \* fafieldsToAscii
    - \* postProcessing.pro
    - \* writeFlatness
  - releaseAreaMapping
    - \* Make
    - \* releaseAreaMapping.C
    - \* releaseAreaMapping.pro
  - scripts
    - \* foam2shape.py
    - \* meshtxt2shape.py
    - \* paraview\_exportShapefile.py
    - \* shape2dict.py
    - \* txt2mesh.py
  - slopeMesh
    - \* Make
    - \* elevationModels
    - \* slopeMesh.C
    - \* slopeMesh.pro
  - tutorials
    - \* finiteArea

The copyright of individual parts of the supplement might differ from the CC BY 4.0 License.
